# Supplementary material for: Microbial signals, MyD88, and lymphotoxin drive TNF-independent intestinal epithelial tissue damage
Source: J Clin Invest. 2022 Mar 1;132(5):e154993. doi: 10.1172/JCI154993 (PMC8884902; doi:10.1172/JCI154993)
Supplement: Supplemental data [file jci-132-154993-s187.pdf]

## Histology and Immunohistochemistry

Mice were individually euthanized, dissected, and their resected intestinal tissue was immediately fixed in 10% neutral-buffered formalin (Millipore Sigma) 40h after treatment with tamoxifen. Tissue specimens were fixed for 16-24 hours, washed in PBS three times, then placed in 70% ethanol and shipped to Histowiz (Brooklyn, NY) for paraffin embedding, sectioning, staining, and high-resolution (40X) scanning according to standard protocols. H&E histologic severity quantitation was performed using a scoring system previously described for genetic IBD models affecting the small intestine (score range 0-15) or colon (score range 0-12) (114). For CC3-stained sections (Cell Signaling Technology 9661), 10 consecutive crypts from each of 5 sections for small intestine and colon (50 crypts per mouse per segment) were counted. Chromogenic RNA *in situ* hybridization (RNA-ISH) was performed using RNAscope<sup>®</sup> Probe Mm-*Lta* (Advanced Cell Diagnostics 317231) and RNAscope 2.5 HD Assay-Brown Kit (Advanced Cell Diagnostics 322370) according to the manufacturer's specifications. Slides were immediately covered with a coverslip using Cytoseal. Slides were then scanned at 40X magnification with a Zeiss Axio ScanZ.1 (Zeiss). DAB-positive areas were identified against a hematoxylin background in all 5 sections of small intestine and colon on each slide using QuPath v0.2.3. At least two and up to three blinded readers assessed histologic disease severity, CC3 quantitation, and *Lta* quantitation and the results were averaged.

## Antibodies and reagents

Antibodies directed against A20 (Cell Signaling Technology, 5630), ABIN-1 (Millipore Sigma HPA037893), Caspase 8 (Cell Signaling Technology mouse specific 4927 and 4790), CC8 (Cell Signaling Technology 8592), RIPK1 (Cell Signaling Technology 3493), Caspase 3 (Cell Signaling Technology 9662), CC3 (Cell Signaling Technology 9661), PARP (Cell Signaling Technology 9542), mouse RIPK3 (Cell Signaling Technology 95702), phospho-RIPK3 (T231/S232) (Cell Signaling Technology 91702), phospho-RIPK1 (Ser166) rodent specific (Cell Signaling Technology 31122), and GAPDH (Millipore MAB374), were used for western blot. Anti-CC3 (Cell Signaling Technology 9661) was also used for IHC studies. Mouse IFN- $\beta$  ELISA (PBL assay bioscience) was used according to the manufacturer's instructions. Recombinant mouse TNF, mouse IL-18, mouse TL1A, mouse LT $\alpha_1\beta_2$ , human LT $\alpha_3$ , mouse TNFR1-Fc, and mouse LTBR-Fc were purchased from R&D systems. Recombinant mouse RANKL was purchased from BioLegend. Recombinant mouse IL-1 $\beta$  and mouse LIGHT were purchased from Peprotech. Recombinant human TNF was purchased from Enzo Life Sciences.

Pam3CSK4, poly(I:C) HMW, and LPS from E. coli O111:B4 were purchased from Invivogen. Necrostatin-1s (BioVision 2263) and Emricasan (MedChem Express HY-10396) were used at 50 $\mu$ M final concentration. S5H3.2.2 hybridoma cell line (ATCC) expressing monoclonal hamster anti-mouse LT $\alpha$  (65) was provided to BioXcell (Lebanon, New Hampshire) for production of purified monoclonal antibody for in vivo use. InVivoMAb Armenian hamster IgG isotype control anti-glutathione S-transferase (BioXcell #BE0260) was used as a negative control.

#### LT $\alpha$ -Fc conditioned media

Codon-optimized gblocks (IDT) encoding mouse LT $\alpha$  (amino acids 1-202; UniProtKB/Swiss-Prot P09225.1) followed by a GSG linker and mouse IgG2a Fc fusion (amino acid 99-330; UniProtKB/Swiss-Prot P01863) were synthesized and then cloned into pENTR (Addgene Plasmid #17398) using InFusion cloning according to manufacturer's instructions (Clontech). The insert sequence was confirmed and then cloned into pLEX\_307 (Addgene Plasmid #41392) using the Gateway Cloning LR reaction according to manufacturer's instructions (ThermoFisher Scientific). Lentivirus particles were prepared by co-transfection with the packaging plasmid psPAX2 (Addgene Plasmid #12260) and the envelope plasmid pMD2.G (Addgene Plasmid #12259) into HEK293T (ATCC) cells using Lipofectamine 2000 (ThermoFisher Scientific). The lentivirus-containing medium was collected at 72 h post-transfection. After centrifugation, the lentivirus medium was filtered using a 0.45  $\mu$ m syringe filter. HEK293T cells were transduced with diluted lentivirus and selected with puromycin 5  $\mu$ g/ml for several passages. The puromycin was removed and mLT $\alpha$ -Fc conditioned media (mLT $\alpha$ -Fc CM) was collected and filtered over 0.22 $\mu$ m filter. The mLT $\alpha$ -Fc CM was quantitated by ELISA with goat polyclonal LT $\alpha$  capture antibody (R&D systems AF749), rat monoclonal LT $\alpha$  detection antibody (R&D systems MAB749) biotinylated with ChromaLink biotin according to manufacturer's instructions (Trilink Biotechnologies), a recombinant mouse lymphotoxin alpha ELISA reference (R&D systems), peroxidase streptavidin (Jackson ImmunoResearch), and 1-Step Ultra TMB-ELISA (ThermoFisher Scientific).

#### **References:**

114. Erben U et al. A guide to histomorphological evaluation of intestinal inflammation in mouse models. *International journal of clinical and experimental pathology* 2014; 7(8):4557-4576.

**Supplemental Figure 1**

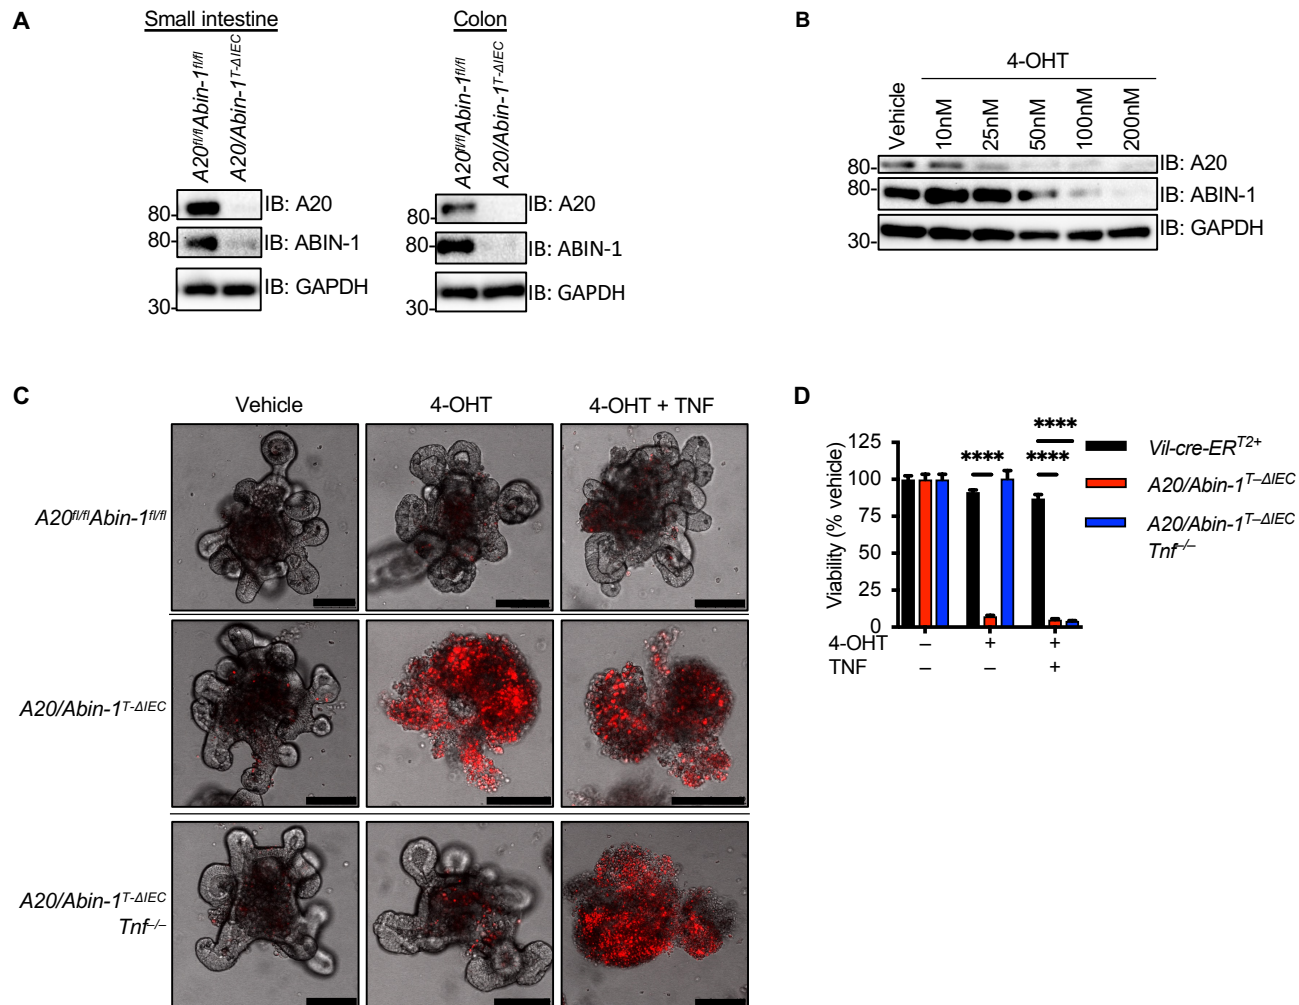

**Supplemental Figure 1. Tamoxifen-induced deletion of floxed *A20* and *Abin-1* on a *Vil-cre-ERT2<sup>+</sup>* background in vivo and in vitro.** (A) Immunoblotting analysis of IECs with the indicated genotypes 40h after treatment with 2mg tamoxifen per os (p.o.). (B) Immunoblotting analysis of *A20/Abin-1<sup>T-ΔIEC</sup>Tnf<sup>-/-</sup>* enteroid cultures treated with the indicated concentration of 4-OHT for 24h. For panels (A,B), lysates were immunoblotted with the antibodies indicated on the right. (C) Representative confocal microscopy images of PI-stained enteroids (pseudocolor red) from indicated genotypes of mice treated with vehicle or 4-OHT for 24h followed by 24 h of 2.5 ng/ml TNF as indicated. Scale bars, 100μm. (D) Quantitative luminescent cell viability assay of enteroid cultures treated as described in (C) (mean ± SEM). For panel (D), significance was assessed by two-way ANOVA with Dunnett's multiple comparison test comparing *A20/Abin-1<sup>T-ΔIEC</sup>* and *A20/Abin-1<sup>T-ΔIEC</sup>Tnf<sup>-/-</sup>* to control *Vil-cre-ERT2<sup>+</sup>* enteroids.

**Supplemental Figure 2**

**A**

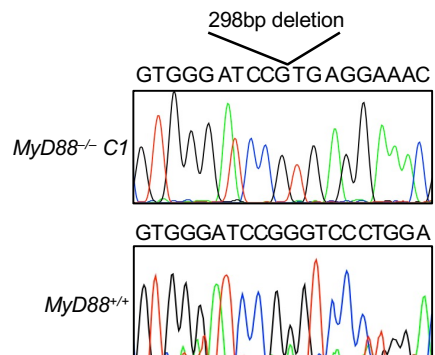

**B**

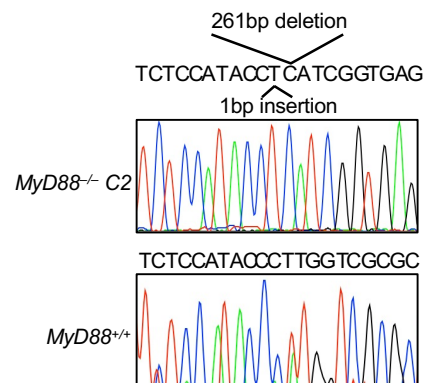

**Supplemental Figure 2. Editing of *MyD88* in *A20/Abin-1*<sup>T-ΔIEC</sup>*Tnf*<sup>-/-</sup> mice.** Nucleotide chromatogram and sequence of the *MyD88* PCR amplicon surrounding the CRISPR-Cas9-targeted site for (A) *MyD88* C1 and (B) *MyD88* C2 in *A20/Abin-1*<sup>T-ΔIEC</sup>*Tnf*<sup>-/-</sup> mice.

**Supplemental Figure 3**

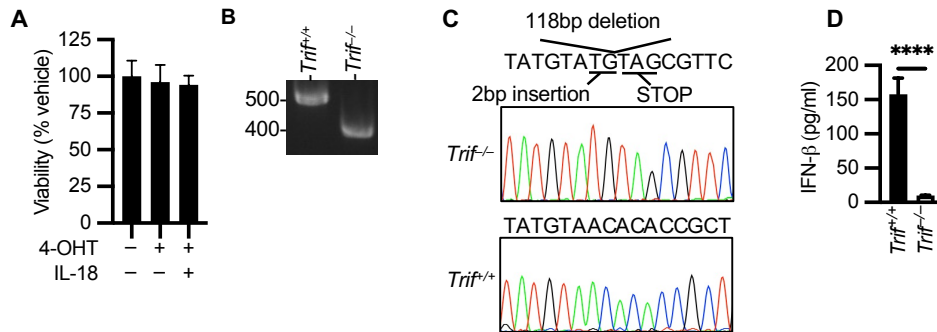

**Supplemental Figure 3. IL18 stimulation of A20/Abin-1<sup>T-ΔIEC</sup>Tnf<sup>-/-</sup> enteroids and editing of Trif in A20/Abin-1<sup>T-ΔIEC</sup>Tnf<sup>-/-</sup> mice. (A)**

Quantitative luminescent cell viability assay of A20/Abin-1<sup>T-ΔIEC</sup>Tnf<sup>-/-</sup> enteroid cultures treated with the indicated stimuli (mean ± SEM; IL-18 25ng/ml). **(B)** Agarose gel electrophoresis and **(C)** nucleotide chromatogram and sequence of the Trif PCR amplicon surrounding the CRISPR-Cas9-targeted site in Trif for A20/Abin-1<sup>T-ΔIEC</sup>Tnf<sup>-/-</sup> mice. **(D)** IFN-β ELISA of mouse splenocytes with the indicated genotype stimulated with 100 μg/ml poly(I:C). For panel **(A)** significance was assessed using one-way ANOVA with Dunnett's multiple comparison test relative to vehicle alone. For panel **(D)**, significance was assessed using unpaired t-test. Only significant differences are shown; \*\*\*\*=p<0.0001. Data represent at least two independent experiments.

**A**

OCTAGACTGCTAGACTCC  
STOP

*Casp8*<sup>-/-</sup>

OCTAGACTGCAACCGAGA

*Casp8*<sup>+/+</sup>

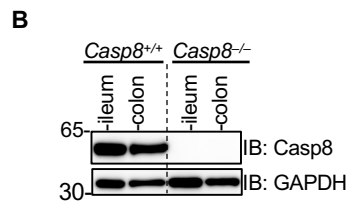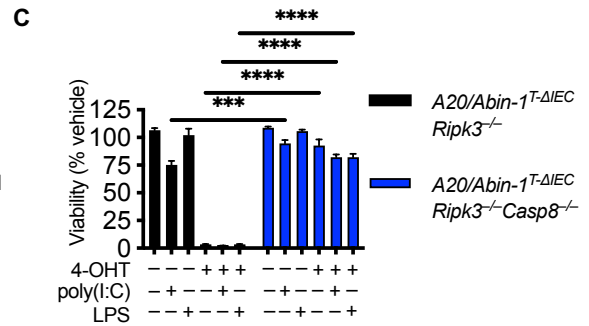

**Supplemental Figure 4. Deletion of *Casp8* in *A20/Abin-1<sup>T-ΔIEC</sup>Ripk3<sup>-/-</sup>* mice and poly(I:C) stimulation of *A20/Abin-1<sup>T-ΔIEC</sup>Ripk3<sup>-/-</sup>* and *A20/Abin-1<sup>T-ΔIEC</sup>Ripk3<sup>-/-</sup>Casp8<sup>-/-</sup>* enteroids. (A)** Nucleotide chromatogram and sequence of the *Casp8* PCR amplicon surrounding the CRISPR-Cas9-targeted site in *Casp8* for *A20/Abin-1<sup>T-ΔIEC</sup>Ripk3<sup>-/-</sup>* mice. **(B)** Immunoblot of intestinal epithelial cells from *A20/Abin-1<sup>T-ΔIEC</sup>Ripk3<sup>-/-</sup>* mice with the indicated *Casp8* genotypes. **(C)** Quantitative luminescent cell viability assay of enteroids with the indicated genotype treated with indicated stimuli, (mean ± SEM). For panel **(C)** statistical significance was assessed by two-way ANOVA with Bonferroni's multiple comparison test between genotypes for each stimulation condition. Only significant differences are shown; \*\*\*=p < 0.001; \*\*\*\*=p < 0.0001. Data represent at least two independent experiments.

**Supplemental Figure 5**

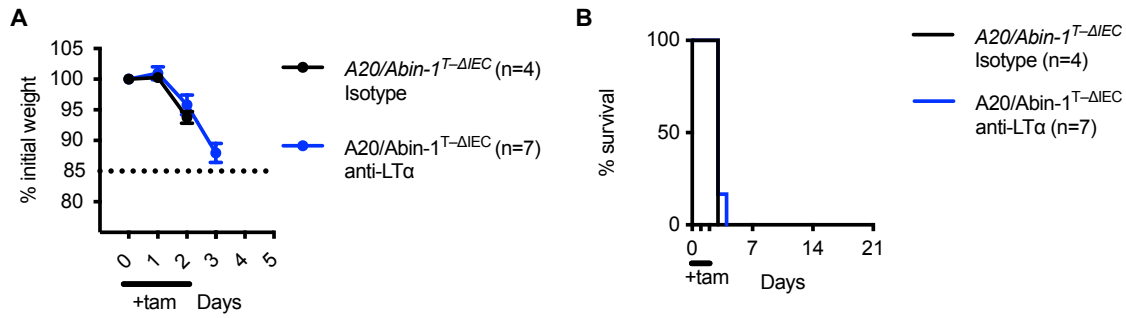

**Supplemental Figure 5. Anti-LT $\alpha$  alone, in the absence of TNF neutralization or depletion, does not improve survival in *A20/Abin-1<sup>T-ΔIEC</sup>* mice.** (A) Weight curve and (B) Kaplan-Meier survival curves of the indicated genotypes of tamoxifen-treated mice treated with anti-LT $\alpha$  or isotype control. For panel (A), significance was assessed by two-way ANOVA with Bonferroni's multiple comparison test. For panel (B), significance was assessed by Log-rank Mantel-Cox test. Only significant differences are shown.

**A** *A20 (TNFAIP3)* *A*

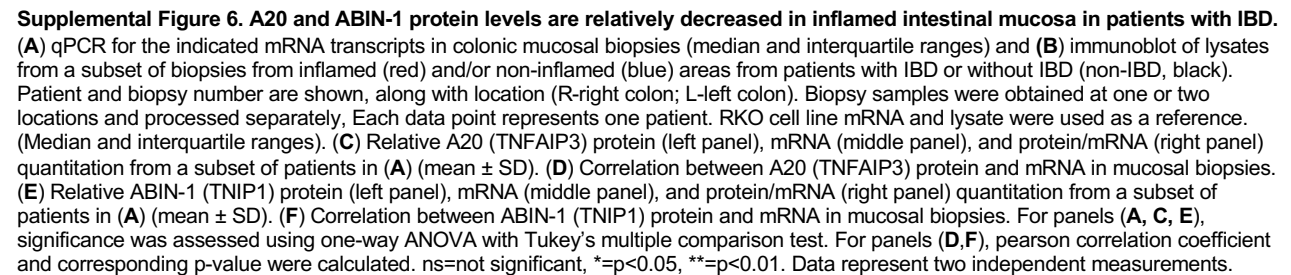

| Characteristic                   |                       | Non-IBD<br>(n=19) | IBD<br>(n=33) | p-value |
|----------------------------------|-----------------------|-------------------|---------------|---------|
| Gender (F/M)                     |                       | 11/8              | 13/20         | 0.25    |
| Age, years median (IQR1–IQR3)    |                       | 53 (36-61)        | 37 (30-48)    | 0.005   |
| Disease type n (%)               |                       |                   |               | <0.0001 |
|                                  | UC                    | 0                 | 20 (61%)      |         |
|                                  | CD                    | 0                 | 13 (39%)      |         |
|                                  | non-IBD               | 19 (100%)         | 0             |         |
| Racial and Ethnic Category n (%) |                       |                   |               | 0.61    |
|                                  | White                 | 15 (79%)          | 28 (85%)      |         |
|                                  | Hispanic              | 1 (5%)            | 0             |         |
|                                  | Black                 | 2 (11%)           | 2 (6%)        |         |
|                                  | Asian                 | 1 (5%)            | 2 (6%)        |         |
|                                  | Other/unknown         | 0                 | 1 (3%)        |         |
| Medication                       |                       |                   |               | <0.0001 |
|                                  | Steroids n (%)        | 0                 | 1 (3%)        |         |
|                                  | Mesalamine n (%)      | 0                 | 6 (18%)       |         |
|                                  | Immunomodulator n (%) | 1 (6%)            | 13 (39%)      |         |
|                                  | Biologic n (%)        | 0                 | 25 (76%)      |         |
|                                  | anti-TNF              |                   | 23 (70%)      |         |
|                                  | other biologic        |                   | 2 (6%)        |         |
| Endoscopic inflammation n (%)    |                       | 0                 | 13 (39%)      | 0.0018  |

**Supplemental Table 1. Baseline demographic and clinical data for study participants.** Categorical variables were analyzed by Fisher's exact or Chi-square tests where appropriate, and non-normally distributed continuous variables were compared using Mann-Whitney test.
